# Supplementary material for: The Impact of Recombination on Nucleotide Substitutions in the Human Genome
Source: PubMed Central journal article supplement (PMC2346554; doi:10.1371/journal.pgen.1000071), 2008-05-09
Supplement: pgen.1000071.s001.pdf [file pgen.1000071.s001.pdf]

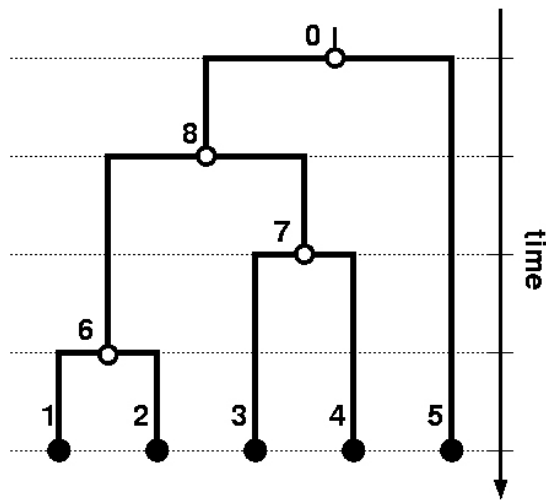

**Supplementary Figure S1: A test phylogeny with 5 leaves which has been used for the first test of the MCML algorithm.** The branch length is proportional to the transversions frequencies, which have been used to generate synthetic sequence alignments (see also Table S1).
