# Supplementary material for: The Impact of Recombination on Nucleotide Substitutions in the Human Genome
Source: PubMed Central journal article supplement (PMC2346554; doi:10.1371/journal.pgen.1000071), 2008-05-09
Supplement: pgen.1000071.s002.pdf [file pgen.1000071.s002.pdf]

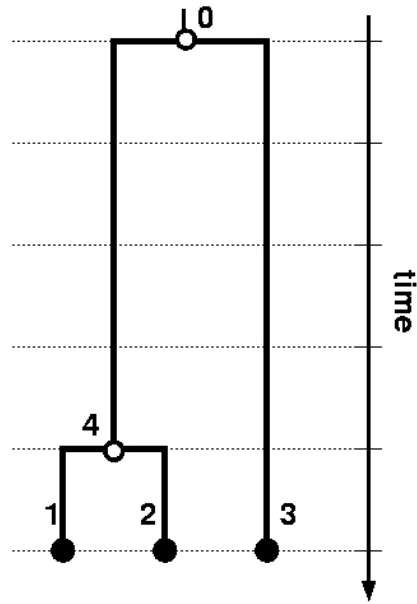

**Supplementary Figure S2: A test phylogeny with 3 leaves reflecting the situation of human, chimp, and macaque alignments.** For the used substitution frequencies see Table S2.
