# Supplementary material for: The Impact of Recombination on Nucleotide Substitutions in the Human Genome
Source: PubMed Central journal article supplement (PMC2346554; doi:10.1371/journal.pgen.1000071), 2008-05-09
Supplement: pgen.1000071.s005.pdf [file pgen.1000071.s005.pdf]

***Correlations between the stationary GC-content and the current GC-content, the crossover rate and distance to telomeres.***

Data set: 1 Mb genome tiling

GC\*: stationary GC-content

GC: current GC-content

CO: crossover rate (HapMap data)

LDT: Log distance to telomere in bp

|                        |              |
|------------------------|--------------|
| GC* vs (GC) :          | $R^2 = 0.25$ |
| GC* vs (LDT) :         | $R^2 = 0.35$ |
| GC* vs (CO) :          | $R^2 = 0.36$ |
| GC* vs (GC, LDT) :     | $R^2 = 0.42$ |
| GC* vs (GC, CO) :      | $R^2 = 0.44$ |
| GC* vs (CO, LDT) :     | $R^2 = 0.47$ |
| GC* vs (GC, CO, LDT) : | $R^2 = 0.51$ |
