# Supplementary material for: The Impact of Recombination on Nucleotide Substitutions in the Human Genome
Source: PubMed Central journal article supplement (PMC2346554; doi:10.1371/journal.pgen.1000071), 2008-05-09
Supplement: pgen.1000071.s006.pdf [file pgen.1000071.s006.pdf]

## Explicit definition of the matrix $Q^{(3)}$

The matrix  $Q^{(3)}$  defined in Methods section takes the form

$$Q^{(3)} = \begin{pmatrix} \text{Matrix of nucleotide triplets} \end{pmatrix}$$

The matrix  $Q^{(3)}$  is a 64x64 matrix where rows and columns are labeled by nucleotide triplets from AAA to TTT. The matrix contains open circles ('o') representing non-vanishing matrix entries due to neighbor independent nucleotide substitution, and filled circles ('•') representing entries due to a neighbor dependent substitution process. The diagonal elements are filled circles ('•').

where an open circle 'o' denotes a non-vanishing matrix entry due to neighbor independent nucleotide substitution, e.g.,  $Q_{ACT,AGT}^{(3)} = q_{CG}$ , and a filled circle '•' denotes an entry due to a neighbor dependent substitution process, e.g.  $Q_{ACA,ACG}^{(3)} = q_{AG} + q_{CPG}$ . The diagonal elements '•' have to be chosen such that all elements in one column add up to zero. All other elements are zero. Rows and columns are labeled by triplets of nucleotides from AAA to TTT as indicated.
